# AngioNet: A Convolutional Neural Network for Vessel Segmentation in X-ray Angiography

Kritika Iyer<sup>1</sup>, Cyrus P. Najarian<sup>1</sup>, Aya A. Fattah<sup>1</sup>, Christopher J. Arthurs<sup>2</sup>, S.M. Reza Soroushmehr<sup>1</sup>, Vijayakumar Subban<sup>3</sup>, Mullasari A. Sankardas<sup>3</sup>, Raj R. Nadakuditi<sup>1</sup>, Brahmajee K. Nallamothu<sup>1</sup>, and C. Alberto Figueroa\*<sup>1</sup>

<sup>1</sup> University of Michigan, Ann Arbor, MI, USA

<sup>2</sup> King's College London, Strand, London, United Kingdom

<sup>3</sup> Madras Medical Mission, Chennai, Tamil Nadu, India

\*corresponding author

[figueroa@med.umich.edu](mailto:figueroa@med.umich.edu)

2800 Plymouth Road Building 20 – 210W Ann Arbor, MI 48109, USA.

## ABSTRACT

Coronary Artery Disease (CAD) is commonly diagnosed using X-ray angiography, in which images are taken as radio-opaque dye is flushed through the coronary vessels to visualize stenosis severity. Cardiologists typically use visual estimation to approximate the percent diameter reduction of the stenosis, and this directs therapies like stent placement. A fully automatic method to segment the vessels would eliminate potential subjectivity and provide a quantitative and systematic measurement of diameter reduction. Here, we have designed a convolutional neural network, AngioNet, for vessel segmentation in X-ray angiography images. The main innovation in this network is the introduction of an Angiographic Processing Network which significantly improves segmentation performance on multiple network backbones, with the best performance using Deeplabv3+ (Dice score 0.864, sensitivity 0.918, specificity 0.987). We have also demonstrated the interchangeability of our network in measuring vessel diameter with Quantitative Coronary Angiography. Our results indicate that AngioNet is a powerful tool for automatic angiographic vessel segmentation that could facilitate systematic anatomical assessment of coronary stenosis in the clinical workflow.

## 30 INTRODUCTION

31 Coronary Artery Disease (CAD) affects over 20 million adults in the United States and accounts for nearly one-  
32 third of adult deaths in western countries<sup>1-3</sup>. The annual cost to the United States healthcare system for the first  
33 year of treatment is \$5.54 billion<sup>4</sup>. The disease is characterized by the buildup of plaque in the coronary arteries  
34<sup>5,6</sup>, which causes a narrowing of the blood vessel known as stenosis.

35 CAD is most commonly diagnosed using X-ray angiography<sup>7</sup>, whereby a catheter is inserted into the  
36 patient and a sequence of X-ray images are taken as radio-opaque dye is flushed into the coronary arteries.  
37 Cardiologists typically approximate stenosis severity via visual inspection of the X-ray images, estimating the  
38 percent reduction in diameter or cross-sectional area. If the area reduction is believed to be greater than 70%, a  
39 revascularization procedure, such as stent placement or coronary artery bypass grafting surgery, may be  
40 performed to treat the stenosis<sup>8,9</sup>.

41 Quantitative Coronary Angiography, or QCA, is a diagnostic tool used in conjunction with X-ray  
42 angiography to more accurately determine stenosis severity<sup>10,11</sup>. QCA is an accepted standard for assessment of  
43 coronary artery dimensions and uses semi-automatic edge-detection algorithms to quantify the change in vessel  
44 diameter. The QCA software then reports the diameter at user-specified locations as well as the percentage  
45 diameter reduction at the stenosis<sup>12</sup>. Although QCA is more quantitative than visual inspection alone, it requires  
46 human input and time to identify the stenosis and to manually correct the vessel boundaries before calculating  
47 the stenosis percentage. This has led to QCA largely being used in the setting of clinical studies with limited  
48 impact on patient care. A fully automatic angiographic segmentation algorithm would speed up the process of  
49 determining stenosis severity, eliminate the need for subjective manual corrections, and potentially lead to  
50 broader utilization in clinical workflows.

51 Fully-automated angiographic segmentation is particularly challenging due to the poor signal-to-noise  
52 ratio and overlapping structures such as the catheter and the patient's spine and rib cage<sup>13</sup>. Several filter-based  
53 approaches<sup>13-22</sup> and convolutional neural networks (CNNs)<sup>23-28</sup> have been developed for angiographic  
54 segmentation. While many of these approaches had success in isolating the coronary vessels, many are time-

55 consuming and require manual correction, while others are limited in their ability to separate the vessels from  
56 other structures such as the catheter.

57 To address these shortcomings, we have developed a new CNN for angiographic segmentation:  
58 AngioNet, which combines an Angiographic Processing Network (APN) with a semantic segmentation network.  
59 The APN was trained to address several of the challenges specific to angiographic segmentation, including low  
60 contrast images, presence of the catheter, and overlapping bony structures. AngioNet uses Deeplabv3+ as its  
61 backbone semantic segmentation network instead of U-Net or other simpler fully convolutional networks  
62 (FCNs), which are more commonly used for medical segmentation. The deeper architecture of Deeplabv3+  
63 compared to the FCNs typically used for medical segmentation allows our network to learn more features and  
64 perform well in challenging cases. In this paper, we also explored the specific benefits of the APN – and the  
65 importance of using Deeplabv3+ as the backbone – by comparing segmentation accuracy in Deeplabv3+ and U-  
66 Net, trained both with and without the APN. Lastly, we performed clinical validation of segmentation accuracy  
67 by comparing AngioNet-derived vessel diameter against QCA-derived diameter.

## 68 RESULTS

### 69 Patient Characteristics

70  
71 1. UM Dataset: This dataset was composed of de-identified angiograms acquired using a Siemens Artis Q  
72 Angiography system at the University of Michigan (UM) Hospital. The enrollment criterion for this dataset  
73 was patients referred for a diagnostic coronary angiography procedure done at the UM Hospital in 2017.  
74 Patients with pacemakers, implantable defibrillators, or prior cardiac surgery with coronary artery bypass  
75 grafts were excluded, as these prior procedures introduce artifacts and additional vascular conduits.  
76 Furthermore, patients with diffuse stenosis were excluded as this is less common in arteries suitable for  
77 revascularization and is a challenging case for segmentation. In our sample of 161 patients, 14 had severe  
78 stenosis ( $\leq 80\%$  diameter reduction) and the remaining had mild to moderate stenosis. The dataset was  
79 composed of 280 images of the left coronary artery (LCA) and 182 images of the right coronary artery  
80 (RCA), which were equally split into 6 partitions to generate a 5-fold cross validation dataset and a test set.

81 2. MMM QCA Dataset: The Madras Medical Mission (MMM) QCA dataset contained independently  
82 generated three-vessel QCA reports of 89 patients, encompassing 223 vessels in both the LCA and RCA.  
83 All patients presented with mild to moderate stenosis. The data were acquired from the Indian  
84 Cardiovascular Core Laboratory (ICRF) at the MMM, which serves as a core laboratory with experience in  
85 clinical trials and other studies and has expertise in QCA.

## 86 87 **Learned Filters using the Angiographic Processing Network**

88  
89 The main contribution of our work is the development of an Angiographic Processing Network (APN). The  
90 purpose of the APN is to learn the best possible preprocessing filter that will improve segmentation  
91 performance, incorporating the characteristics of boundary sharpening and contrast enhancing filters. The  
92 APN works in tandem with segmentation neural networks (backbone networks) to create a composite neural  
93 network such as AngioNet, a combination of the APN and Deeplabv3+.

94 Figure 1 contains examples of the filters that the APN learned when it was trained with Deeplabv3+  
95 or U-Net, respectively. The images represent the output of the APN, and thus the input to the backbone  
96 network. Although the APN was initialized with the combination of unsharp mask filters shown in Figure  
97 1, the network learns different filters that perform a combination of contrast-enhancement and boundary  
98 sharpening. The examples given are the results of training with different data partitions during k-fold cross-  
99 validation. The large variations in the learned filters come from an inherent property of neural network  
100 training; since minimization of the neural network's loss function is a non-convex optimization problem<sup>44</sup>,  
101 there are many combinations of network weights which will lead to similar results. The effect of these  
102 varied learned filters on segmentation accuracy is described in the next section.

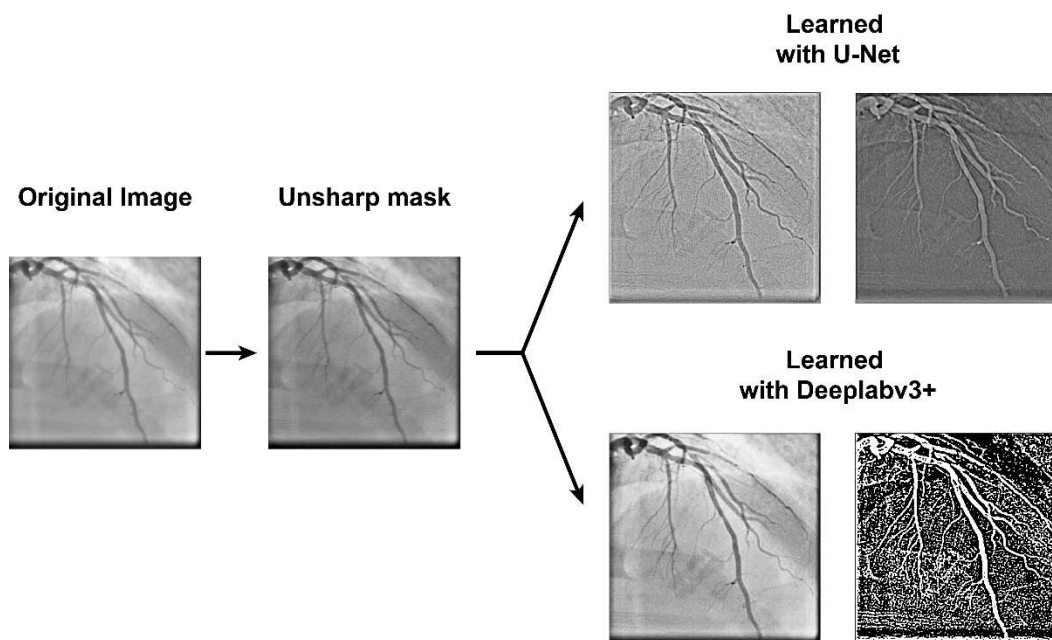

103

104 *Figure 1 - Examples of learned filters when the APN is trained with Deeplabv3+ and U-Net. The APN was initialized*  
 105 *with the combination of unsharp mask filters shown above, and learned new filters to aid segmentation. Each example*  
 106 *image is the output of the APN after training with different data partitions.*

## 107 **Comparison of AngioNet versus Current State-of-the-art Semantic Segmentation** 108 **Neural Networks**

109 Segmentation accuracy was measured using the Dice score, given by

$$110 \quad \text{Dice} = \frac{2|Y \cap \hat{Y}|}{|Y| + |\hat{Y}|}. \quad (1)$$

111 Here,  $Y$  is the label image and  $\hat{Y}$  is the neural network prediction, each of which is a binary image  
 112 where vessel pixels have a value of 1 and background pixels have a value of 0.  $|Y|$  denotes the number of  
 113 vessel pixels (1s) in image  $Y$ , and  $\cap$  represents a pixel-wise logical AND operation. Alternatively, the Dice  
 114 score can be defined in terms of the true positives (TP), false positives (FP) and false negatives (FN) of the  
 115 neural network prediction with respect to the label image, and is then given by

$$116 \quad \text{Dice} = \frac{2TP}{2TP + FP + FN}. \quad (2)$$

117 We also report the Area under the Receiver-Operator Curve (AUC), which measures the ability of  
 118 the network to separate classes, in this case, vessel and background pixels. An AUC of 0.5 indicates a model  
 119 that is no better than random chance, whereas an AUC of 1 indicates a model that can perfectly discriminate

120 between classes. Finally, we also report the pixel accuracy of the binary segmentation, defined as

121 
$$\text{Pixel Accuracy} = \frac{TP + TN}{TP + TN + FP + FN}. \quad (3)$$

122 1. UM Dataset: The accuracy of AngioNet was validated using a 5-fold cross-validation study, in which  
123 the neural network was trained on 4 out of the 5 training data partitions at a time, with the fifth partition  
124 reserved for validation and hyperparameter optimization (hold-out set). This process was repeated five  
125 times, holding out a different partition each time. The accuracy of the resulting five trained networks was  
126 measured on the sixth partition, the test set, which was never used for training. The mean k-fold accuracy  
127 and the accuracy when trained on all five training data partitions are summarized in Table 1. The network  
128 performs well on both LCA and RCA input images (Figure 2) and does not segment the catheter or other  
129 imaging artifacts despite uneven brightness, overlapping structures, and varying contrast.

130 *Table 1: Accuracy of AngioNet using K-Fold Cross Validation*

|                       | <b>Dice Score</b> | <b>Sensitivity</b> | <b>Specificity</b> | <b>AUC</b>  | <b>Pixel Accuracy</b> |
|-----------------------|-------------------|--------------------|--------------------|-------------|-----------------------|
| <b>k-Fold Test</b>    | 0.856±0.004       | 0.913±0.013        | 0.987±0.001        | 0.991±0.002 | 0.982±0.004           |
| <b>k-Fold Holdout</b> | 0.857±0.012       | 0.909±0.012        | 0.987±0.001        | 0.990±0.002 | 0.980±0.003           |
| <b>All Data</b>       | 0.864             | 0.918              | 0.987              | 0.991       | 0.983                 |

131

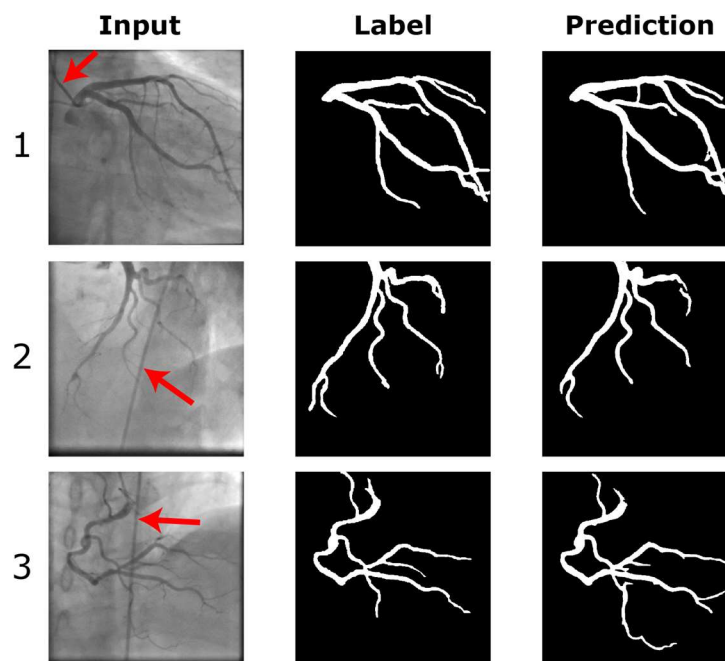

132

133 *Figure 2 - Examples of AngioNet segmentation on left coronary tree, taken at two different angles (1,2), and right*  
134 *coronary tree (3). AngioNet does not segment the catheter (red arrows), despite its similar diameter and pixel intensity*  
135 *as the vessels (2,3). It also ignores bony structures such as the spine in (3) and ribs in (1).*

136 The Dice score distribution on the test set for AngioNet, Deeplabv3+, U-Net with the APN  
137 (APN+U-Net), and U-Net is shown in Figure 3A. All networks were trained using the UM Dataset.  
138 AngioNet has the highest mean Dice score on the test set (0.864) when trained on all five partitions of the  
139 training data, compared to 0.815 for Deeplabv3+ alone, 0.811 for APN+U-Net, and 0.717 for U-Net alone.  
140 On average, AngioNet has a 10% higher Dice score per image than Deeplabv3+ alone. APN+U-Net has a  
141 14% higher Dice score than U-Net alone. A paired Student's t-test was performed to determine if the  
142 addition of the APN significantly improved the Dice score for both network backbones. The p-value  
143 between AngioNet and Deeplabv3+ was 5.76e-10, while the p-value between APN+U-Net and U-Net was  
144 2.63e-16. Both p-values were much less than the statistical significance threshold of 0.05, therefore we can  
145 conclude that there are statistically significant differences between the Dice score distributions with and  
146 without the APN. Furthermore, both Deeplabv3+ and U-Net exhibit outliers with Dice score lower than  
147 0.4, but adding the APN eliminates these outliers in both networks.

148 Compared to the other three networks, AngioNet performs the best on the challenging cases shown  
149 in Figure 3B. The first column of Figure 3B shows segmentation performance on a low contrast



150 angiography image. AngioNet can segment the major coronary vessels in this image, whereas Deeplabv3+  
 151 only segments one vessel and U-Net is unable to identify any vessels at all. APN+U-Net can segment more  
 152 vessels than U-Net alone, indicating once again that the addition of the APN improves segmentation  
 153 performance on these low contrast images. In the second column, both AngioNet and APN+U-Net can  
 154 segment fainter and smaller diameter vessels than the other two networks. Finally, we observe that  
 155 AngioNet and Deeplabv3+ did not segment the catheter in the third column, although it is of similar  
 156 diameter and curvature as the coronary vessels. Conversely, both APN+U-Net and U-Net included the  
 157 catheter in their segmentations. Overall, AngioNet segmented the catheter in 2.6% of the images, where the  
 158 catheter curved across the image and overlapped with the vessel. In contrast, Deeplabv3+ segmented the  
 159 catheter in 6.4% of images. Both networks performed better than U-Net and APN+U-Net, which segmented  
 160 the catheter in 19.5% and 9.1% of images respectively.

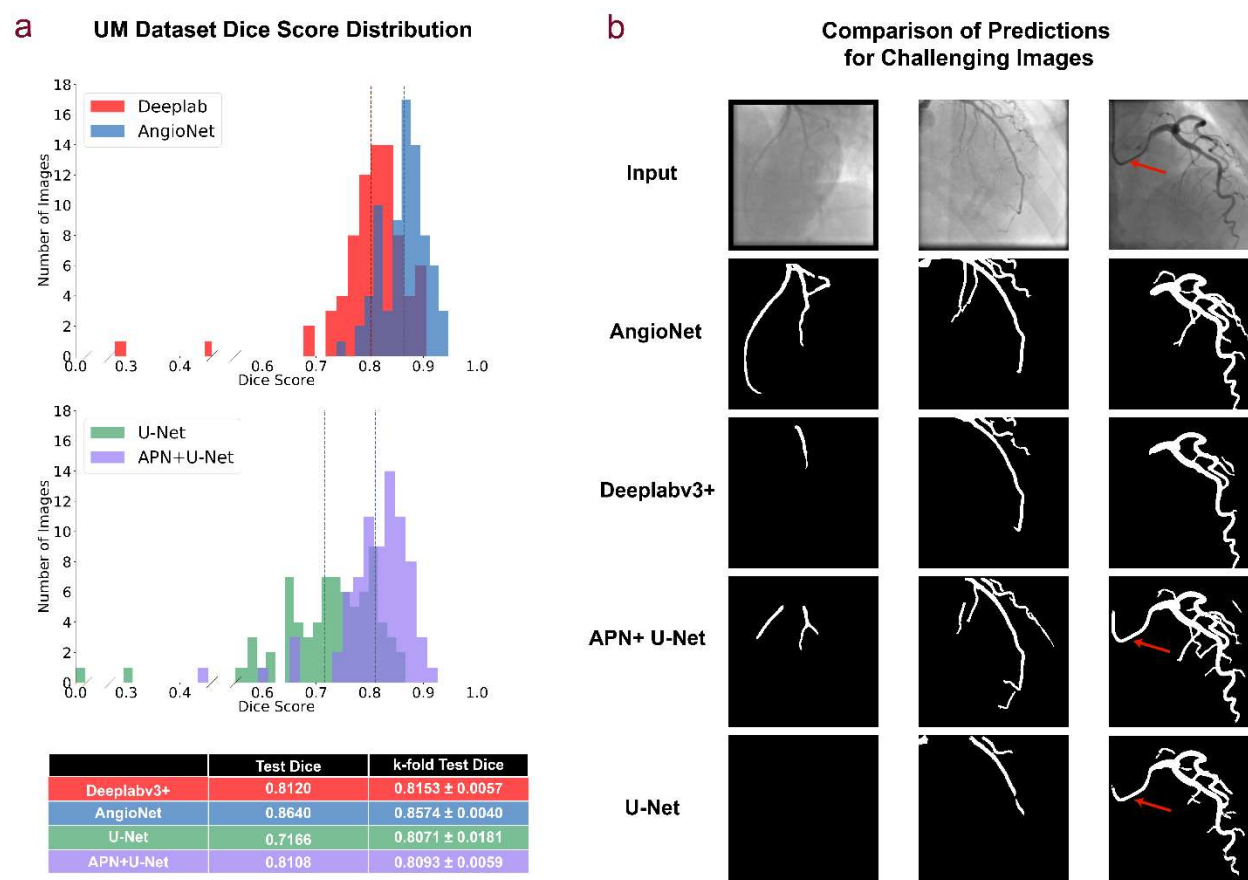

161  
 162 *Figure 3 - Summary of AngioNet (APN + Deeplabv3+) performance. All results are derived from the networks trained*  
 163 *on all five partitions of the UM training set, unless otherwise noted as a k-fold result. a) Comparison of Dice score*



164 distribution on test set. *AngioNet* has the highest average Dice score, with scores ranging from 0.737 to 0.946. Adding  
165 the APN improves the lowest Dice scores of both *Deeplabv3+* and *U-Net*. Dashed lines correspond to the Test Dice  
166 in the table below. b) Segmentation comparison on challenging images with low contrast, faint vessels, and a curved  
167 catheter. *AngioNet* can segment more vessels in these images without segmenting the catheter (red arrows).

## 168 Evaluation of Vessel Diameter Accuracy versus QCA

169 Evaluation of vessel diameter accuracy was done using the MMM QCA dataset. Maximum and minimum  
170 vessel diameter were compared in 255 vessels including both the RCA and LCA. On average, the absolute  
171 error in vessel diameter between the *AngioNet* segmentation and QCA report was 0.272mm or 1.15 pixels.

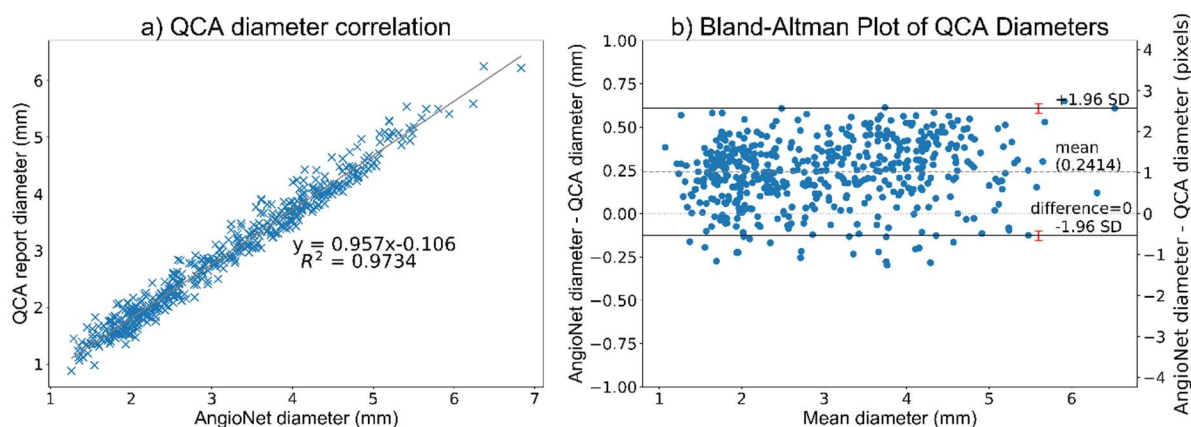

172  
173 *Figure 4 - a) Correlation plot of QCA and AngioNet derived vessel diameters. b) The Bland-Altman plot demonstrates*  
174 *that AngioNet's segmentation and QCA are interchangeable methods to determine vessel diameter since more than*  
175 *95% of points lie within the limits of agreement. The red error bars represent the 95% confidence interval containing*  
176 *the limits of agreement. The mean difference in diameter between methods is 0.24mm or 1.1 pixels*

177 The linear regression plot in Figure 4A shows that vessel diameter estimates of both methods are  
178 linearly proportional and tightly clustered around the line of best fit,  $y = 0.957x - 0.106$ , Pearson's  
179 correlation coefficient,  $r = 0.9866$ . The standardized difference<sup>45</sup>, also known as Cohen's effect size<sup>46</sup>,  
180 was used to determine the difference in means between the diameter distributions of *AngioNet* and QCA.  
181 The standardized difference can determine significant differences between two groups in clinical studies<sup>45</sup>.  
182 The standardized difference between the *AngioNet* and QCA diameter distributions is 0.215, suggesting  
183 small differences between the two method.

184 Figure 4B is a Bland-Altman plot demonstrating the interchangeability of the QCA and *AngioNet*-  
185 derived diameters. The mean difference between both measures,  $\bar{d}$ , is 0.2414. The magnitude of the  
186 diameter difference remains relatively constant for all mean diameter values, indicating that there is a

187 systematic error and not a proportional error between the two measurements. The limits of agreement are  
188 defined as  $\bar{d} \pm 1.96$  SD, where SD is the standard deviation of the diameter differences. For both  
189 measurements to be considered interchangeable, 95% of data points must lie between these limits of  
190 agreement. In this plot, 96% of data points are within  $\bar{d} \pm 1.96$  SD. When including the 95% confidence  
191 interval of the limits of agreement as recommended by Bland and Altman <sup>47</sup>, 97% of data points are within  
192 the range.

## 193 DISCUSSION

194 To put our work in context, the most common approaches to angiographic segmentation involve image  
195 processing techniques such as edge detection algorithms, matrix decomposition, wavelet-based methods, active  
196 contours, or the Frangi vesselness filter <sup>13-18</sup>. Although these techniques can produce successful segmentations,  
197 they perform poorly on low-contrast or noisy images and cannot separate overlapping catheters and bony  
198 structures from the vessels. Several other approaches to angiographic segmentation such as Hessian-based  
199 random walk, region-growing, parametric density estimation, and deformation models have been explored <sup>19-22</sup>;  
200 these semi-automatic methods still require manual correction or user input, ultimately hampering their  
201 applicability within the clinical workflow. To address these limitations, some have turned to convolutional neural  
202 networks (CNNs) for angiographic segmentation instead.

203 CNNs have been used for segmentation in numerous applications <sup>29-34</sup>. Although originally designed  
204 for biomedical image segmentation, U-Net and its variations have been widely adopted in other fields due to  
205 their relatively simple architecture and high accuracy on binary segmentation problems <sup>36-38</sup>. Despite its success,  
206 the network is not as deep as other state-of-the-art CNNs and thus lacks the expressive power to perform complex  
207 tasks such as angiographic segmentation <sup>39-41</sup>. A more complex CNN for semantic segmentation is Deeplabv3+  
208 <sup>42,43</sup>. Although Deeplabv3+ performs well on multi-class segmentation tasks, it was not designed with the  
209 specific challenges of angiographic imaging in mind.

210 Several CNNs have been designed specifically for angiographic segmentation <sup>23-28</sup>. Yang et al. <sup>23</sup>  
211 developed a CNN to segment the major branches of the coronary arteries. Despite its high segmentation

212 accuracy, this network was only developed for single vessel segmentation. Multichannel Segmentation Network  
213 with Aligned input (MSN-A)<sup>24</sup>, is a CNN based on U-Net designed to segment the entire coronary tree. The  
214 inputs to MSN-A are the angiographic image and a co-registered “mask” image taken before the dye was injected  
215 into the vessel. The main drawback of this network is that the multi-input strategy requires the entire  
216 angiographic sequence to be acquired with minimal table motion, whereas standard clinical practice involves  
217 moving the patient table to follow the flow of dye within the vessels. Nasr-Esfahani et al.<sup>25</sup> developed their own  
218 CNN architecture for angiographic segmentation, combining contrast enhancement, edge detection, and feature  
219 extraction. Shin et al.<sup>26</sup> combined a feature-extraction convolutional network with a graph convolutional  
220 network and inference CNN to create Vessel Graph Network (VGN) and improve segmentation performance  
221 by learning the tree structure of the vessels. Despite successfully segmenting most of the branches of the coronary  
222 tree, both of these methods had lower accuracy than MSN-A.

223 In the following sections, we will demonstrate that AngioNet is comparable to these state-of-the-  
224 art methods for angiographic segmentation. The key findings and clinical implications of our study are also  
225 described below.

### 226 **Learned Filters using the Angiographic Processing Network**

227 As seen in Figure 1, the APN learns many different preprocessing filters that improve segmentation  
228 performance based on the data partition used for training. All learned filters exhibit both boundary  
229 sharpening and local contrast enhancement, likely due to the network’s initialization as a combination of  
230 unsharp mask filters. Despite the variation in the learned filters, the overall segmentation accuracy remains  
231 relatively constant as indicated by the small standard deviation from k-fold cross validation (0.004 for  
232 AngioNet, and 0.006 for APN+U-Net). This demonstrates that despite the large variation to the human eye,  
233 the different combinations of learned weights all achieved similar local minima of the loss function, leading  
234 to similar Dice scores. When compared to Deeplabv3+’s predictions on images preprocessed using unsharp  
235 masking filters, AngioNet’s segmentation accuracy is superior (0.864 for AngioNet, compared to 0.833 for  
236 Deeplabv3+). This suggests that the learned preprocessing filter implemented in this work is superior to  
237 manually selecting a particular contrast enhancement or boundary sharpening filter for preprocessing.

## 238 **Comparison of AngioNet to Current State-of-the-Art Semantic Segmentation Neural** 239 **Networks**

240 Several aspects of AngioNet's design contribute to its enhanced segmentation performance compared to  
241 existing state of the art networks. The APN successfully improves segmentation performance on low  
242 contrast images compared to previous state-of-the-art semantic segmentation networks (Figure 3A). The  
243 APN also enhances performance on smaller vessels, which have lower contrast than larger vessels because  
244 they contain less radio-opaque dye. Without the APN, Deeplabv3+ and U-Net are not equipped to identify  
245 these faint vessels and underpredict the presence of small coronary branches. As seen in Figure 3A and  
246 Figure 3B, both Deeplabv3+ and AngioNet perform better than U-Net on angiographic segmentation. The  
247 addition of the APN to U-Net significantly increases the mean Dice score, facilitates segmentation of more  
248 vessels compared to U-Net alone, and greatly reduces the proportion of segmentation that include the  
249 catheter; yet APN+U-Net has some of the same drawbacks of U-Net such as disconnected vessels and more  
250 instances of the catheter being segmented compared to Deeplabv3+ and AngioNet. Although U-Net has  
251 demonstrated great success in other binary segmentation applications<sup>35,37</sup>, the presence of catheters and  
252 bony structures with similar dimensions and pixel intensity as the vessels of interest make this a particularly  
253 challenging segmentation task. Deeplabv3+ and AngioNet have a deeper, more complex architecture,  
254 which allows these networks to learn more features with which to identify the vessels in each image<sup>39-41</sup>.

255 The effective receptive field size U-Net is 64x64 pixels whereas that of Deeplabv3+ is 128x128  
256 pixels<sup>48</sup>. A larger receptive field is associated with better pixel localization and segmentation accuracy, as  
257 well as classification of larger scale objects in an image<sup>49,50</sup>. Deeplabv3+'s larger receptive field may  
258 explain why Deeplabv3+ and AngioNet are more successful in avoiding segmentation of the catheter, an  
259 object typically larger than U-Net's 64x64 pixel receptive field. The larger receptive field may also explain  
260 why Deeplabv3+ and AngioNet are better able to preserve the continuity of the coronary vessel tree and  
261 produce fewer broken or disconnected vessels than U-Net and APN+U-Net. Thus, Deeplabv3+ was an  
262 appropriate choice of network backbone for AngioNet.

263 AngioNet also demonstrates advantages compared to networks trained specifically for

264 angiographic segmentation. Shin *et al.* reported a maximum Dice score of 0.82 and 0.837 on two datasets  
265 of retinal angiograms using VGN, whereas AngioNet's maximum Dice score is 0.946<sup>26</sup>. Fan *et al.* reported  
266 Dice scores of 0.872 on a test set of 18 angiograms using MSN-A<sup>24</sup>. AngioNet's mean Dice score of 0.864  
267 is very close to MSN-A's 0.872. Although our mean Dice score is slightly lower than that of MSN-A, the  
268 major advantage of our network is that its input angiograms are not limited to those acquired with minimal  
269 movement of the patient table. AngioNet's additional strengths compared to previous networks include  
270 ignoring overlapping structures when segmenting the coronary vessels, smaller sensitivity to noise, and the  
271 ability to segment low contrast images. The ability to avoid overlapping bony structures or the catheter is  
272 especially important as this eliminates the need for manual correction of the vessel boundary, which is a  
273 major advantage over mechanistic segmentation approaches.

274 AngioNet's greatest limitation is that it overpredicts the vessel boundary in cases of severe (>85%)  
275 stenosis. The network performs well on mild and moderate stenoses, but it has learned to smooth the vessel  
276 boundary when the diameter sharply decreases to a single pixel. This is likely due to the low number of  
277 training examples containing severe stenosis: only 14 out of the 462 images in the entire UM Dataset  
278 contained severe stenosis, and two of these were in the test set. This drawback can be addressed by  
279 increasing the training data to encompass more examples of severe stenosis.

## 280 **Evaluation of Vessel Diameter Accuracy**

281 A significant clinical implication of our findings was the comparison between AngioNet and QCA. In  
282 Figure 4A, we observe that QCA and AngioNet results are clustered around the line of best fit,  $y =$   
283  $0.957x - 0.106$ . Given that the slope of the line of best fit is nearly 1, the intercept is close to 0, and the  
284 Pearson's coefficient  $r$  is 0.9866, the line of best fit indicates strong agreement between these two methods  
285 of determining vessel diameter. The  $R^2$  coefficient for the linear regression model implies that 97.34% of  
286 the variance in the data can be explained by the line of best fit.

287 The standardized difference, or effect size, is a measure of how many pooled standard deviations  
288 separate the means of two distributions<sup>45</sup>. According to Cohen, an effect size of 0.2 is considered a small  
289 difference between both groups, 0.5 is a medium difference, and 0.8 is a large difference<sup>46</sup>. Given that the

290 effect size between the QCA and AngioNet diameter distributions was 0.215 (91.5% overlap between the  
291 two distributions), we can conclude that the difference between QCA and AngioNet diameters are small.  
292 Furthermore, since the standardized difference indicated no large difference between QCA and AngioNet  
293 diameter estimations, these results suggest that both methods can be used interchangeably from a clinical  
294 perspective for the dataset examined.

295 The Bland-Altman plot in Figure 4B shows that the mean difference between QCA and AngioNet  
296 diameters is approximately 1.1 pixels. AngioNet under-predicts the vessel boundary by no more than 1  
297 pixel and over-predicts by no more than 2.5 pixels. To put these values in context, the inter-operator  
298 variability for annotating the vessel boundary is  $0.18 \pm 0.24$ mm or slightly above 1 pixel according to a  
299 study by Hernandez-Vela et al <sup>51</sup>. The 95% confidence intervals of the limits of agreement were taken into  
300 consideration when determining how many data points lie between the limits of agreement as recommended  
301 by Bland and Altman <sup>47</sup>. 97% of the data points lie within the range, which is greater than the 95% threshold.  
302 Given these results, and that the standardized difference test which produced no significant difference  
303 between the methods, one can conclude that QCA and AngioNet are interchangeable methods to determine  
304 vessel diameter. Given AngioNet's fully automated nature, the workload required for generating QCA due  
305 to human input could be substantially reduced. Although our direct comparison of AngioNet-derived  
306 diameters with QCA-derived diameters required user interaction, future work will focus on developing an  
307 automated algorithm for stenosis detection and measurement based on the outputs of AngioNet's  
308 segmentation.

309 In conclusion, AngioNet was designed to address the shortcomings of current state-of-the-art neural  
310 networks for X-ray angiographic segmentation. The APN was found to be a critical component to improve  
311 detection and segmentation of the coronary vessels, leading to 14% and 10% improved Dice score  
312 compared to U-Net or Deeplabv3+ alone. AngioNet demonstrated better segmentation accuracy than U-  
313 Net and Deeplabv3+, particularly on images with poor contrast or many small vessels. It also demonstrated  
314 increased robustness to ignoring the catheter and other imaging artifacts compared to other networks.  
315 Furthermore, our statistical analysis of the vessel diameters determined by AngioNet and traditional QCA



316 demonstrated that the two methods may be interchangeable which could have large implications for clinical  
 317 workflows. Future work to improve performance will focus on increasing accuracy on severe stenosis cases  
 318 and automating stenosis measurement.

## 319 METHODS

### 320 Datasets

321 Figure 5 summarizes the two patient datasets used in this work for neural network training and evaluation  
 322 of performance against clinically relevant metrics and other state-of-the-art networks. All data were  
 323 collected in compliance with ethical guidelines.

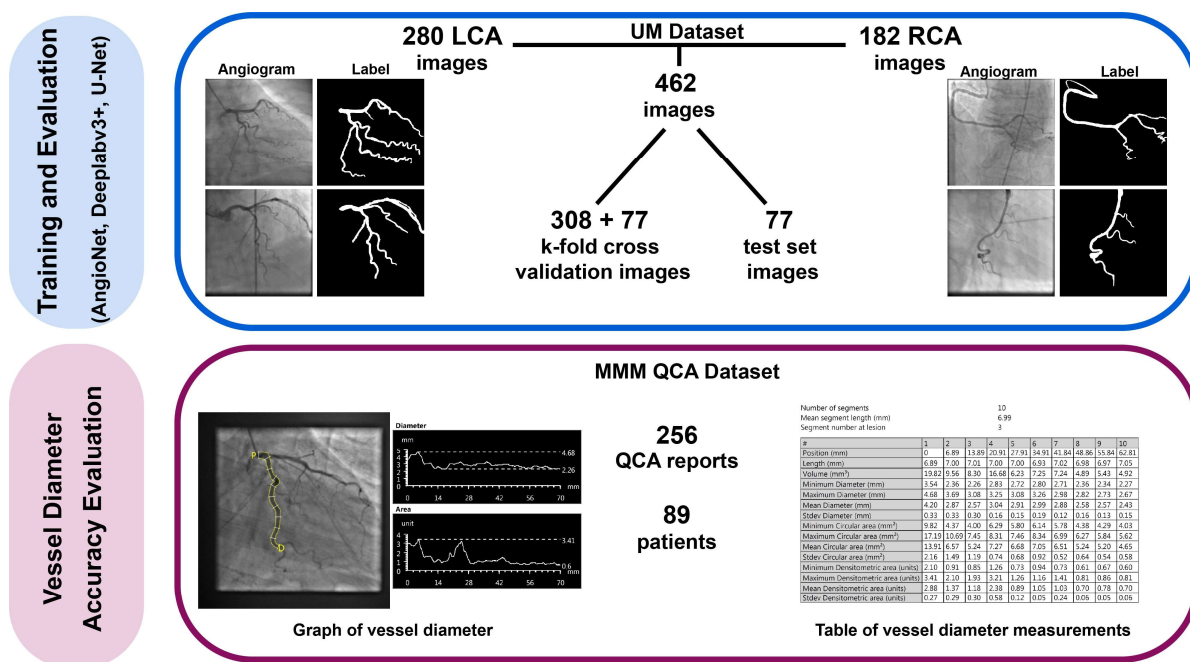

324  
 325 *Figure 5 - Diagram of datasets for CNN training and evaluation. AngioNet's performance was compared against*  
 326 *state-of-the-art neural networks, all trained on the UM Dataset. The MMM QCA dataset was used to quantify*  
 327 *segmentation diameter accuracy by comparing AngioNet's results against the diameters reported in QCA. Acronyms:*  
 328 *left coronary artery (LCA); right coronary artery (RCA); Madras Medical Mission (MMM).*

329  
 330 1. UM Dataset: The UM Dataset was composed of 462 de-identified coronary angiograms acquired at the  
 331 UM Hospital. The study protocol to access this data (HUM00084689) was reviewed by the Institutional  
 332 Review Boards of the University of Michigan Medical School (IRBMED). Since the data was collected  
 333 retrospectively, IRBMED approved use without requiring informed consent.



334 The data were equally split by patient into a 5-fold cross-validation set and test set to avoid having images  
335 from the same patient in both the training and test sets. Labels for all images were manually generated using  
336 Adobe Photoshop to include vessels with a diameter greater than 1mm at their origin. The 5-fold cross-  
337 validation portion of the dataset was used for neural network training and hyperparameter optimization,  
338 whereas the test set was used to evaluate segmentation accuracy.

339 There is a great number of artifacts in X-ray angiography images, including borders from X-ray  
340 filters, rotation of the image frame, varying levels of contrast, and magnification during image acquisition.  
341 Data augmentation of the UM dataset was employed to account for this variability. Horizontal and vertical  
342 flips of the images were included to make the network segmentation invariant to image orientation. Random  
343 zoom up to 20%, rotation up to 10%, and shear up to 5% were used to account for variation in magnification  
344 and imaging angles. When zooming out, shearing, or rotating the image, a constant black fill was used to  
345 mimic images acquired using physical X-ray filters. The combination of the above data augmentations  
346 created a training dataset of over half a million images to improve network generalizability. Data  
347 augmentation was not applied to the test set. The augmented UM dataset was used for neural network  
348 training, and the test set was used to compare segmentation accuracy.

349 2. MMM Dataset: The percent change in vessel diameter at the region of stenosis is a key determinant of  
350 whether a patient requires an intervention or not; therefore, the accuracy of AngioNet's segmented vessel  
351 diameters was assessed in addition to its overall segmentation accuracy. Although the main result of a QCA  
352 report is the overall percent change in vessel diameter, these reports also contain measurements of  
353 maximum, minimum, and mean diameter in 10 equal segments of the vessel of interest. These diameter  
354 measurements in the MMM QCA Dataset were used to evaluate the discrepancies between QCA and  
355 AngioNet.

356 The data provided by the MMM ICRF Cardiovascular Core Laboratory includes independent and  
357 detailed analysis of quantitative angiographic parameters (minimum lesion diameter, percent diameter  
358 stenosis, reference vessel diameters, lesion length, maximum percent diameter stenosis, etc.) as per  
359 American College of Cardiology/American Heart Association standards, through established QCA

360 software (CAAS-5.10.2, Pie Medical Corp). The study protocol for this data (Computer-Assisted Diagnosis  
361 of Coronary Angiography) was approved by the Institutional Ethics Committee of the Madras Medical  
362 Mission. This data was obtained using an unfunded Materials Transfer Agreement between UM and MMM.  
363 Since the data is completely anonymized and cannot be re-identified, it does not qualify as human subjects  
364 research according to OHRP guidelines.

365 To validate the accuracy of AngioNet's segmented vessel diameters, a MATLAB script was  
366 employed for user specification of the same vessel regions as those in the QCA report. Two regions from  
367 the QCA report were sampled in each angiogram. The first was the most proximal region, containing the  
368 maximum vessel diameter, and the second was the region of stenosis (given in the QCA report), if present.  
369 If no stenosis was reported, the region containing minimum diameter was selected. A skeletonization  
370 algorithm<sup>52</sup> was used to identify the centerline and radius map of the selected vessel region. Using the  
371 output of the skeletonization algorithm, the script reported the maximum and minimum diameters at the  
372 selected regions and compared them against the diameters in the QCA report. Maximum and minimum  
373 vessel diameter were chosen rather than the diameters on either side of stenosis since the purpose of using  
374 the QCA reports was to systematically assess overall vessel diameter accuracy, not the percent diameter  
375 reduction. A diagram of the comparison between QCA and AngioNet diameters is shown in Figure 6.

**a** QCA Report Diameter

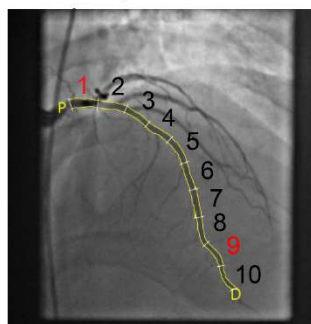

| #                         | 1     | 2     | 3     | 4     | 5     | 6     | 7     | 8     | 9     | 10    |
|---------------------------|-------|-------|-------|-------|-------|-------|-------|-------|-------|-------|
| Position (mm)             | 0     | 10.55 | 21.09 | 31.76 | 42.25 | 52.93 | 63.47 | 74.07 | 84.69 | 95.27 |
| Length (mm)               | 10.55 | 10.54 | 10.67 | 10.49 | 10.67 | 10.55 | 10.60 | 10.62 | 10.58 | 10.62 |
| Volume (mm <sup>3</sup> ) | 23.54 | 8.98  | 7.52  | 7.85  | 7.12  | 5.41  | 5.09  | 4.74  | 3.98  | 3.06  |
| Minimum Diameter (mm)     | 2.72  | 2.43  | 1.98  | 2.01  | 2.11  | 2.05  | 1.95  | 1.86  | 1.64  | 1.39  |
| Maximum Diameter (mm)     | 3.60  | 2.92  | 2.59  | 2.57  | 2.41  | 2.35  | 2.32  | 2.15  | 1.97  | 1.85  |
| Mean Diameter (mm)        | 3.15  | 2.73  | 2.16  | 2.39  | 2.27  | 2.19  | 2.13  | 1.98  | 1.82  | 1.62  |

Proximal Region max diameter: 3.60 mm  
Distal Region min diameter: 1.64 mm

**b** Segmentation Diameter

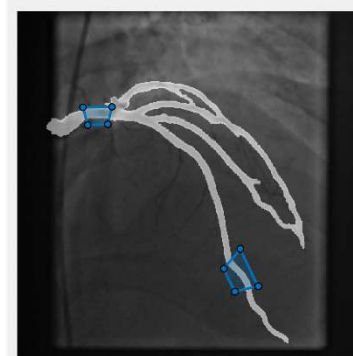

Proximal Region max diameter: 3.74 mm  
Distal Region min diameter: 1.72 mm

376

377 *Figure 6 - a) Annotated QCA report, along with the corresponding diameters in the report table. Highlighted values*  
 378 *correspond to maximum (proximal) and minimum (distal) diameters (segments 1 and 9, respectively). b) Schematic*  
 379 *of how a MATLAB script was used to delineate regions in the neural network segmentation corresponding to the*  
 380 *regions measured in the QCA report, along with the computed proximal and distal diameters.*  
 381

382 **CNN Design and Training**

383 1. Design: AngioNet was created by combining Deeplab v3+ and an Angiographic Processing  
 384 convolutional neural network (APN). A diagram of the network architecture is given in Fig. 3. Each  
 385 component of AngioNet, the APN and Deeplabv3+, was trained separately before fine-tuning the entire  
 386 network.

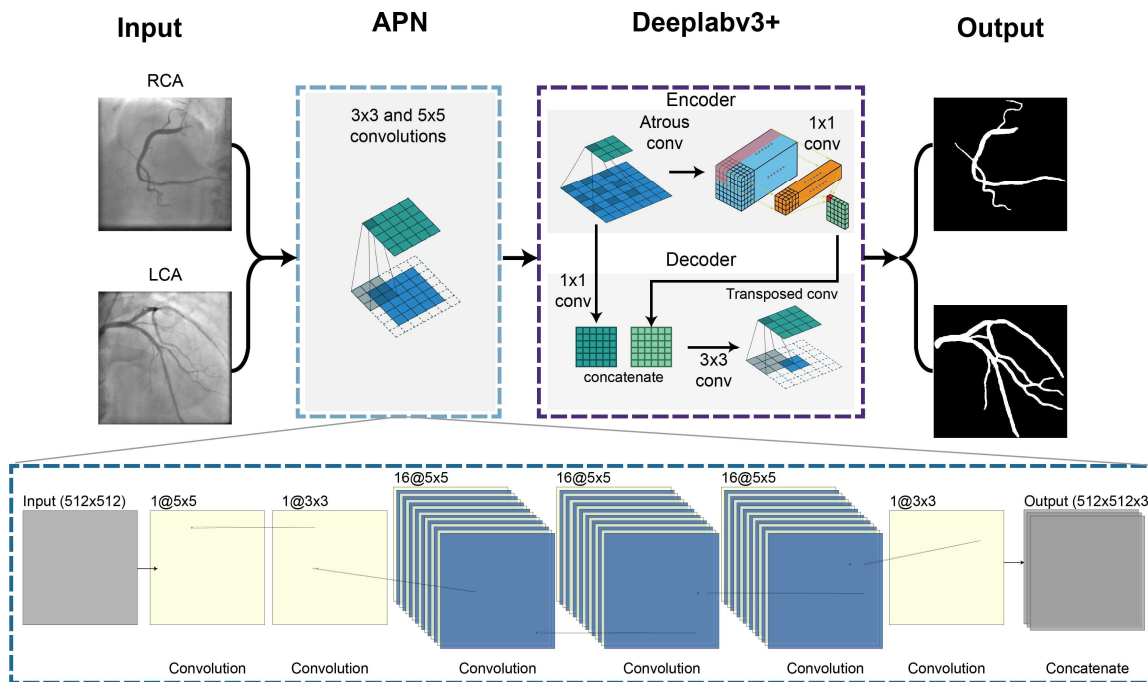

387

388 *Figure 7 - AngioNet Architecture Diagram. AngioNet is composed of an Angiographic Processing Network (APN) in*  
 389 *tandem with Deeplabv3+. The APN is designed to improve local contrast and vessel boundary sharpness.*

390 The purpose of the APN was to address some of the challenges specific to angiographic  
 391 segmentation, namely poor contrast and the lack of clear vessel boundaries. The APN was initially trained  
 392 to mimic a combination of standard image processing filters instead of initializing with random weights,  
 393 since it would later be fine-tuned with a pre-trained backbone network. A combination of unsharp mask  
 394 filters was chosen as these can improve boundary sharpness and local contrast at the edges of the coronary  
 395 vessels, making the segmentation task easier. Other forms of preprocessing were also considered, including  
 396 Contrast Limited Adaptive Histogram Equalization (CLAHE) and singular value decomposition (SVD)  
 397 denoising. CLAHE has previously been used as an image preprocessing step for angiographic segmentation  
 398 <sup>25</sup>, but this method only improves contrast without improving boundary sharpness. SVD denoising was  
 399 explored as this method could be used to remove imaging artifacts such as filters, patient ribs, or the  
 400 catheter. While successful in removing these artifacts, SVD denoising also reduced the image sharpness  
 401 and removed portions of the vascular tree in some images. Therefore, AngioNet's APN was designed with  
 402 unsharp mask filters in mind due to their clear advantages in image preprocessing. Using unsharp masking  
 403 as an initialization, the training process was used to learn a new filter that was best suited for angiographic

404 segmentation.

405 2) Training The Deeplabv3+ CNN architecture was cloned from the official Tensorflow Deeplab GitHub  
406 repository, maintained by Liang-Chieh Chen and co-authors<sup>42</sup>. The network was initialized with pre-trained  
407 weights from the same repository, as recommended by the authors for training on a new dataset. The input  
408 to this network were raw angiographic images, and the output was a binary segmentation. Training was  
409 conducted using four NVIDIA Tesla K80 GPUs on the American Heart Association Precision Medicine  
410 Platform (<https://precision.heart.org/>), hosted by Amazon Web Services. Hyperparameters such as batch  
411 size, learning rate, learning rate optimizer, and regularization were tuned. We observed that training with  
412 larger batch size led to better generalization to new data. A batch size of 16 was used as this was the largest  
413 batch size we could fit into memory using four GPUs. The Adam optimizer was chosen to adaptively adjust  
414 the learning rate, and L2 regularization was used to reduce the chance of over-fitting. The vessel pixels  
415 account for 15-19% of the total pixels in any given angiography image. Due to this class imbalance, it was  
416 important to encourage classification of vessel pixels over background using weighted cross-entropy loss<sup>53</sup>.

417 The APN was initially trained to mimic the output of several unsharp mask filters applied in series  
418 (parameters: radius = 60, amount = 0.2 and radius = 2, amount = 1). This ensured the APN architecture was  
419 complex enough to learn the equivalent of multiple filters with sizes up to 121x121 using only 3x3 and 5x5  
420 convolutions. The number of 3x3 versus 5x5 convolutions as well as the network width and depth were  
421 adjusted until the APN could reproduce the results of the serial unsharp mask filters. Additionally, the  
422 combination of standard filters was hypothesized to be a good initialization before training the network to  
423 learn the best possible preprocessing filter. The inputs to the APN were the normalized images from the  
424 augmented UM Dataset, whereas the output was a filtered version of the image. The ground truth images  
425 were generated by applying several unsharp mask filters with various parameters to each normalized  
426 clinical image. The APN was composed of several 3x3 and 5x5 convolutional layers (Figure 7) and was  
427 trained to mimic the unsharp mask filters by minimizing the Mean Squared Error (MSE) loss between the  
428 prediction and ground truth images. The APN design and training were carried out using TensorFlow 2.0,  
429 integrated with Keras<sup>54,55</sup>.

430           Once the APN and Deeplabv3+ networks were individually trained, the two CNNs were combined  
431 to form AngioNet using the Keras functional Model API <sup>56</sup> (Figure 7). The resulting network was trained  
432 with a low learning rate to fine-tune the combined model. Since neither the APN nor Deeplabv3+ were  
433 frozen during fine-tuning, both were able to adjust their weights to better complement each other: the APN  
434 learned a better filter than its unsharp mask initialization, and Deeplabv3+ learned the weights that could  
435 most accurately segment the vessel from the output of the APN. Batch size, regularization, learning rate,  
436 and learning rate optimizer parameters were once again tuned. The same process of pre-training, combining  
437 models, and fine-tuning was carried out with the APN and U-Net to determine how much the backbone  
438 network contributes to segmentation performance. U-Net was not initialized with pre-trained weights as  
439 our dataset was adequately large to train this network from random initialization.

440           During all phases of training, batch normalization layers were frozen at their pre-trained values as  
441 we did not have a large enough dataset to retrain these layers. Furthermore, all hyperparameter optimization  
442 was performed on the 5-fold cross validation holdout set and accuracy was measured on the test set.

## 443 DATA AND CODE AVAILABILITY

444 Since the datasets used in this work contain patient data, these cannot be made generally available to the  
445 public due to privacy concerns. The code for the AngioNet architecture and examples of synthetic  
446 angiograms are available at <https://github.com/kritiyer/AngioNet>. This code is licensed under a Polyform  
447 Noncommercial license.

## 448 ACKNOWLEDGMENT

449 Funding for this work was provided by a grant from the American Heart Association [19A1ML34910010].  
450 KI was funded by the National Science Foundation Graduate Research Fellowship Program [DGE1841052]  
451 and Rackham Merit Fellowship, and CAF was supported by the Edward B. Diethrich Professorship. CJA  
452 was funded by a King's Prize Research Fellowship via the Wellcome Trust Institutional Strategic Support  
453 Fund grant to King's College London [204823/Z/16/Z].

454 The authors would like to thank the American Heart Association Precision Medicine Platform  
455 (<https://precision.heart.org/>), which was used for data analysis. Neural network prototyping and initial  
456 testing were carried out on a Titan XP GPU granted to our lab by the NVIDIA GPU grant program.

## 457 COMPETING INTEREST STATEMENT

458 C Alberto Figueroa and Brahmajee K Nallamothu are founders of AngioInsight, Inc. AngioInsight is a  
459 startup company that is using machine learning and signal processing to assist physicians with the  
460 interpretation of angiograms. AngioInsight did not sponsor this work. This work is a part of a provisional  
461 patent that has been filed by the University of Michigan.

## 462 REFERENCES

- 463 1. Sanchis-Gomar, F., Perez-Quilis, C., Leischik, R. & Lucia, A. Epidemiology of coronary heart disease  
464 and acute coronary syndrome. *Ann. Transl. Med.* **4**, 256 (2016).
- 465 2. Townsend, N. *et al.* Cardiovascular disease in Europe: epidemiological update 2016. *Eur. Heart J.* **37**,  
466 3232–3245 (2016).
- 467 3. Go, A. S. *et al.* Heart Disease and Stroke Statistics - 2013 Update: A Report from the American Heart  
468 Association. *Circulation* **127**, (2013).
- 469 4. Russell, M. W., Huse, D. M., Drowns, S., Hamel, E. C. & Hartz, S. C. Direct Medical Costs of Coronary  
470 Artery Disease in the United States. *Am. J. Cardiol.* **81**, 1110–1115 (1998).
- 471 5. Nichols, W. W., O'Rourke, M. F., Vlachopoulos, Charalambos. & McDonald, D. A. *McDonald's*  
472 *Blood Flow in Arteries : Theoretical, Experimental and Clinical Principles.* (Hodder Arnold, 2011).
- 473 6. Feigl, E. O. Coronary Physiology. *Physiol. Rev.* **63**, 1–205 (1983).
- 474 7. Nieman, K. *et al.* Usefulness of Multislice Computed Tomography for Detecting Obstructive Coronary  
475 Artery Disease. *Am. J. Cardiol.* **89**, 913–918 (2002).
- 476 8. Morice, M.-C. *et al.* A Randomized Comparison of a Sirolimus-Eluting Stent with a Standard Stent for  
477 Coronary Revascularization. *N. Engl. J. Med.* **346**, 1773–1780 (2002).



- 478 9. Stadius, M. L. & Alderman, E. L. Editorial: Coronary Artery Revascularization Critical Need for, and  
479 Consequences of, Objective Angiographic Assessment of Lesion Severity. *Circulation* **82**, 2231–2234  
480 (1982).
- 481 10. Klein, A. K., Lee, F. & Amini, A. A. Quantitative Coronary Angiography with Deformable Spline  
482 Models. *IEEE Trans. Med. Imaging* **16**, 468–482 (1997).
- 483 11. Reiber, J. H. C. An overview of coronary quantitation techniques as of 1989. in *Quantitative Coronary*  
484 *Arteriography* (eds. Reiber, J. H. C. & Serruys, P. W.) 55–132 (Kluwer Academic Publishers, 1997).
- 485 12. Mancini, G. B. *et al.* Automated Quantitative Coronary Arteriography: Morphologic and Physiologic  
486 Validation in vivo of a Rapid Digital Angiographic Method. *Circulation* **75**, 452–460 (1987).
- 487 13. Lin, C. Y. & Ching, Y. T. Extraction of Coronary Arterial Tree Using Cine X-ray Angiograms. *Biomed.*  
488 *Eng. - Appl. Basis Commun.* **17**, 111–120 (2005).
- 489 14. Herrington, D. M., Siebes, M., Sokol, D. K., Siu, C. O. & Walford, G. D. Variability in measures of  
490 coronary lumen dimensions using quantitative coronary angiography. *J. Am. Coll. Cardiol.* **22**, 1068–  
491 1074 (1993).
- 492 15. Canero, C. & Radeva, P. Vesselness Enhancement Diffusion. *Pattern Recognit. Lett.* **24**, 3141–3151  
493 (2003).
- 494 16. Frangi, A. F., Niessen, W. J., Vincken, K. L. & Viergever, M. A. Multiscale Vessel Enhancement  
495 Filtering. in *Medical Image Computing and Computer-Assisted Intervention --- MICCAI'98* (eds.  
496 Wells, W. M., and Colchester, A. & Delp, S.) (Springer Berlin Heidelberg, 1998).
- 497 17. Shang, Y. *et al.* Vascular Active Contour for Vessel Tree Segmentation. *IEEE Trans. Biomed. Eng.* **58**,  
498 1023–1032 (2011).
- 499 18. Xia, S. *et al.* Vessel Segmentation of X-Ray Coronary Angiographic Image Sequence. *IEEE Trans.*  
500 *Biomed. Eng.* **67**, 1338–1348 (2020).
- 501 19. Pappas, T. & Lim, J. S. A New Method for Estimation of Coronary Artery Dimensions in Angiograms.  
502 *IEEE Trans. Acoust. Speech Signal Process.* **36**, 1501–1513 (1988).
- 503 20. M'Hiri, F., Duong, L., Desrosiers, C. & Cheriet, M. Vesselwalker: Coronary Arteries Segmentation

- 504 Using Random Walks and Hessian-based Vesselness Filter. in *Proceedings - International Symposium*  
505 *on Biomedical Imaging* 918–921 (2013). doi:10.1109/ISBI.2013.6556625.
- 506 21. Lara, D. S. D., Faria, A. W. C., Araújo, A. D. A. & Menotti, D. A Novel Hybrid Method for the  
507 Segmentation of the Coronary Artery Tree in 2D Angiograms. *Int. J. Comput. Sci. Inf. Technol. IJCSIT*  
508 **5**, (2013).
- 509 22. Chen, S. J. & Carroll, J. D. 3-D Reconstruction of Coronary Arterial Tree to Optimize Angiographic  
510 Visualization. *IEEE Trans. Med. Imaging* **19**, 318–336 (2000).
- 511 23. Yang, S. *et al.* Deep learning segmentation of major vessels in X-ray coronary angiography. *Sci. Rep.*  
512 **9**, 1–11 (2019).
- 513 24. Fan, J. *et al.* Multichannel Fully Convolutional Network for Coronary Artery Segmentation in X-Ray  
514 Angiograms. *IEEE Access* **6**, 44635–44643 (2018).
- 515 25. Nasr-Esfahani, E. *et al.* Segmentation of Vessels in Angiograms using Convolutional Neural Networks.  
516 *Biomed. Signal Process. Control* **40**, 240–251 (2018).
- 517 26. Shin, S. Y., Lee, S., Yun, I. D. & Lee, K. M. Deep Vessel Segmentation By Learning Graphical  
518 Connectivity. *ArXiv* (2018).
- 519 27. Cervantes-Sanchez, F., Cruz-Aceves, I., Hernandez-Aguirre, A., Hernandez-Gonzalez, M. A. &  
520 Solorio-Meza, S. E. Automatic Segmentation of Coronary Arteries in X-ray Angiograms using  
521 Multiscale Analysis and Artificial Neural Networks. *Appl. Sci.* **9**, 5507 (2019).
- 522 28. Zhu, X., Cheng, Z., Wang, S., Chen, X. & Lu, G. Coronary angiography image segmentation based on  
523 PSPNet. *Comput. Methods Programs Biomed.* 105897 (2020) doi:10.1016/j.cmpb.2020.105897.
- 524 29. Rawat, W. & Wang, Z. Deep Convolutional Neural Networks for Image Classification: A  
525 Comprehensive Review. *Neural Comput.* **29**, 2352–2449 (2017).
- 526 30. Badrinarayanan, V., Kendall, A. & Cipolla, R. SegNet: A Deep Convolutional Encoder-Decoder  
527 Architecture for Image Segmentation. *IEEE Trans. Pattern Anal. Mach. Intell.* **39**, 2481–2495 (2017).
- 528 31. Khanmohammadi, M., Engan, K., Sæland, C., Eftestøl, T. & Larsen, A. I. Automatic Estimation of  
529 Coronary Blood Flow Velocity Step 1 for Developing a Tool to Diagnose Patients With Micro-

- 530       Vascular Angina Pectoris. *Front. Cardiovasc. Med.* **6**, 1 (2019).
- 531   32. Pohlen, T., Hermans, A., Mathias, M. & Leibe, B. Full-Resolution Residual Networks for Semantic  
532       Segmentation in Street Scenes. in *2017 IEEE Conference on Computer Vision and Pattern Recognition*  
533       (*CVPR*) (2017).
- 534   33. Zhao, H., Shi, J., Qi, X., Wang, X. & Jia, J. Pyramid Scene Parsing Network. *2017 IEEE Conf. Comput.*  
535       *Vis. Pattern Recognit. CVPR* 6230–6239 (2017) doi:10.1109/CVPR.2017.660.
- 536   34. Paszke, A., Chaurasia, A., Kim, S. & Culurciello, E. ENet: A Deep Neural Network Architecture for  
537       Real-Time Semantic Segmentation. *arXiv* (2016).
- 538   35. Ronneberger, O., Fischer, P. & Brox, T. U-Net: Convolutional Networks for Biomedical Image  
539       Segmentation. in *MICCAI 2015: Medical Image Computing and Computer-Assisted Intervention* 234–  
540       241 (2015).
- 541   36. Oktay, O. *et al.* Attention U-Net: Learning Where to Look for the Pancreas. *arXiv* (2018).
- 542   37. Akeret, J., Chang, C., Lucchi, A. & Refregier, A. Radio Frequency Interference Mitigation using Deep  
543       Convolutional Neural Networks. *Astron. Comput.* **18**, 35–39 (2017).
- 544   38. Iglovikov, V. & Shvets, A. TerausNet: U-Net with VGG11 Encoder Pre-Trained on ImageNet for  
545       Image Segmentation. *arXiv* (2018).
- 546   39. Raghu, M., Poole, B., Kleinberg, J., Ganguli, S. & Dickstein, J. S. On the Expressive Power of Deep  
547       Neural Networks. *34th Int. Conf. Mach. Learn. ICML 2017* **6**, 4351–4374 (2017).
- 548   40. Lu, Z., Pu, H., Wang, F., Hu, Z. & Wang, L. The Expressive Power of Neural Networks: A View from  
549       the Width. in *31st Conference on Neural Information Processing Systems* (2017).
- 550   41. Eldan, R. & Shamir, O. The Power of Depth for Feedforward Neural Networks. *J. Mach. Learn. Res.*  
551       **49**, 907–940 (2016).
- 552   42. Chen, L.-C., Papandreou, G., Schroff, F. & Adam, H. Rethinking Atrous Convolution for Semantic  
553       Image Segmentation. *arXiv* (2017).
- 554   43. Chen, L.-C., Zhu, Y., Papandreou, G., Schroff, F. & Adam, H. Encoder-Decoder with Atrous Separable  
555       Convolution for Semantic Image Segmentation. in *ECCV 2018* (2018).

- 556 44. Allen-Zhu, Z. & Hazan, E. Variance Reduction for Faster Non-Convex Optimization. in *Proceedings*  
557 *of The 33rd International Conference on Machine Learning* (2016).
- 558 45. Austin, P. C. Balance Diagnostics for Comparing the Distribution of Baseline Covariates between  
559 Treatment Groups in Propensity-score Matched Samples. *Stat. Med.* **28**, 3083–3107 (2009).
- 560 46. Cohen, J. *Statistical power analysis for the behavioral sciences*. (L. Erlbaum Associates, 1988).
- 561 47. Bland, J. M. & Altman, Douglas. Statistical Methods For Assessing Agreement Between Two  
562 Methods Of Clinical Measurement. *The Lancet* **327**, 307–310 (1986).
- 563 48. fornaxai. fornaxai/receptivefield: Gradient based receptive field estimation for Convolutional Neural  
564 Networks. <https://github.com/fornaxai/receptivefield> (2018).
- 565 49. Liu, Y., Yu, J. & Han, Y. Understanding the effective receptive field in semantic image segmentation.  
566 *Multimed. Tools Appl.* **77**, 22159–22171 (2018).
- 567 50. Wang, P. *et al.* Understanding Convolution for Semantic Segmentation. in *Proceedings - 2018 IEEE*  
568 *Winter Conference on Applications of Computer Vision, WACV 2018* vols 2018-January 1451–1460  
569 (Institute of Electrical and Electronics Engineers Inc., 2018).
- 570 51. Hernandez-Vela, A. *et al.* Accurate Coronary Centerline Extraction, Caliber Estimation, and Catheter  
571 Detection in Angiographies. *IEEE Trans. Inf. Technol. Biomed.* **16**, 1332–1340 (2012).
- 572 52. Telea, A. & Van Wijk, J. J. An Augmented Fast Marching Method for Computing Skeletons and  
573 Centerlines. in *EUROGRAPHICS - IEEE TCVG Symposium on Visualization* (eds. Ebert, D., Bruent,  
574 P. & Navazo, I.) (2002).
- 575 53. Kingman, J. F. C. & Kullback, S. Information Theory and Statistics. *Math. Gaz.* **54**, 90 (1970).
- 576 54. Abadi, M. *et al.* TensorFlow: Large-Scale Machine Learning on Heterogeneous Systems.  
577 <https://www.tensorflow.org/> (2015).
- 578 55. Chollet, F. & others. Keras. <https://keras.io> (2015).
- 579 56. Zakirov, E. keras-deeplab-v3-plus. <https://github.com/bonlime/keras-deeplab-v3-plus> (2019).
- 580
